# Supplementary material for: Dengue virus infection alters post-transcriptional modification of microRNAs in the mosquito vector Aedes aegypti
Source: PubMed Central journal article supplement (PMC4626843; doi:10.1038/srep15968), 2015-10-30
Supplement: srep15968-s1.pdf [file srep15968-s1.pdf]

**Title: Dengue virus infection alters post-transcriptional modification of microRNAs in the mosquito vector *Aedes aegypti***

Kayvan Etebari, Solomon Osei-Amo, Simon Phillip Blomberg and Sassan Asgari

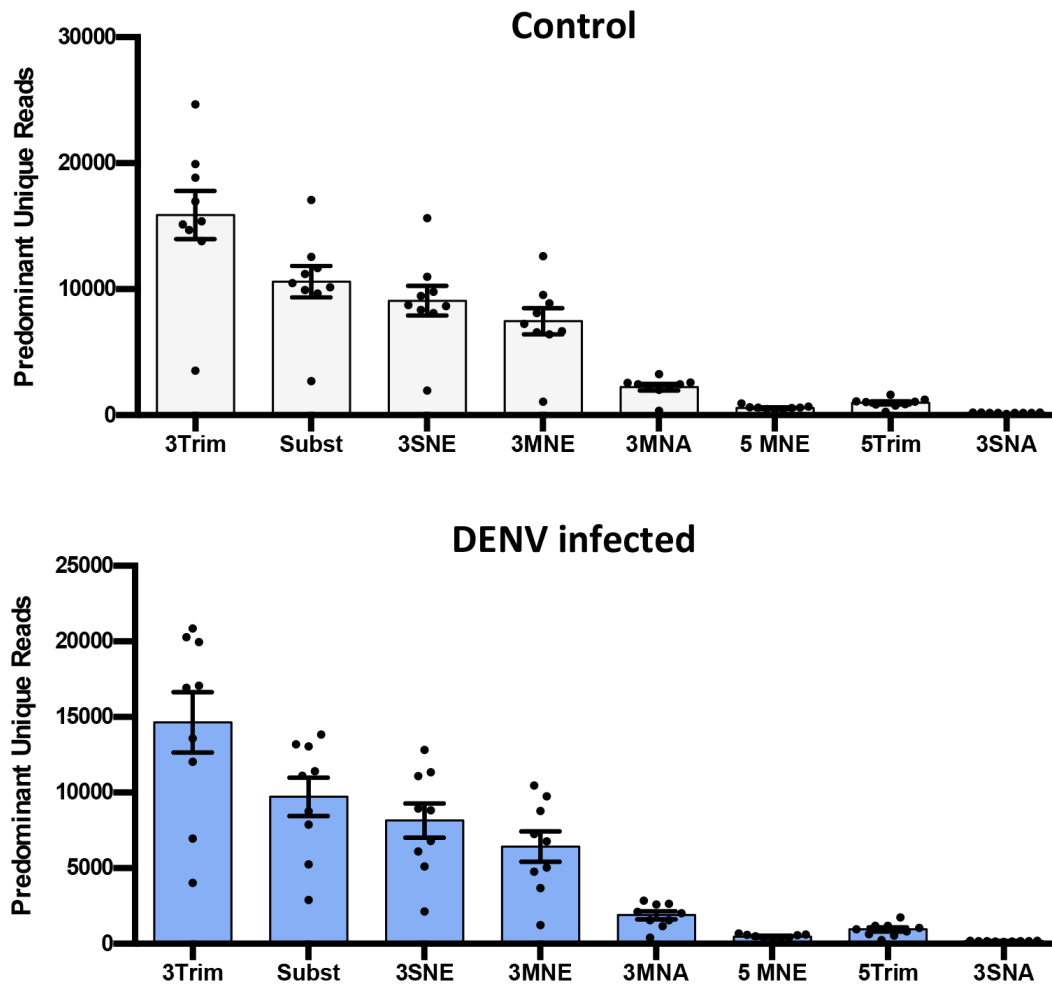

**Figure S1. Different isomiR prevalence across DENV infected and non infected.** Comparison of the proportion of unique reads for each type of isomiR for infected and non-infected mosquitoes (averaged across three time point and three biological replicates). Unique sequences with 3' modification were more abundant than 5' trimmed or extended sequences in all *Ae. aegypti* small RNA libraries. There were no considerable differences among all libraries (DenDf=124, P value= 0.07). 3SNE: 3' single nucleotide extension, 3MNE: 3' multiple nucleotide extension, 3Trim: 3' trimmed, 5MNE: 5' extension, 5Trim: 5' trimmed, Subst: nucleotide substitutions, 3SNA: 3' single nucleotide addition, 3MNA: 3' multiple nucleotide addition.

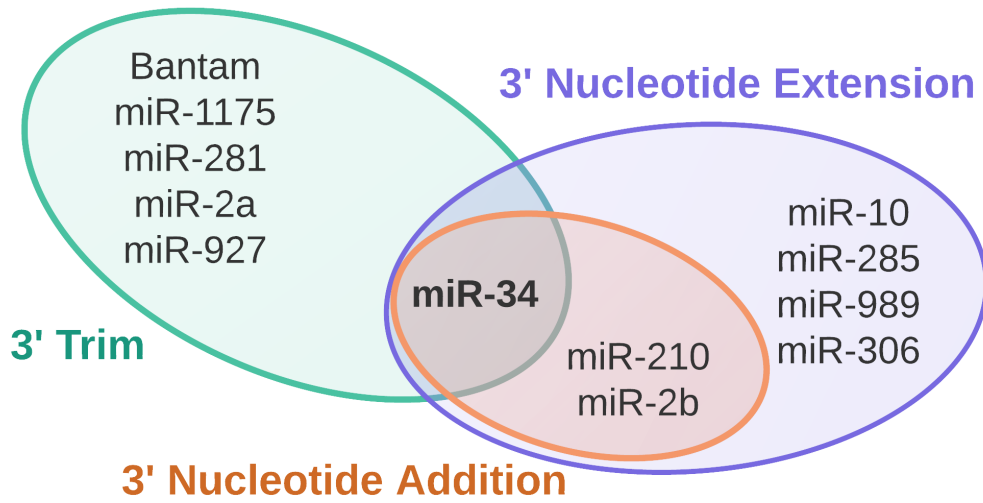

**Figure S2. Venn diagram represent overlapped miRNAs with significant altered 3' isomiRs due to DENV infection.** miR-34 is the only miRNA whose all 3' end modified isomiRs significantly altered by DENV infection ( $P < 0.05$ ).

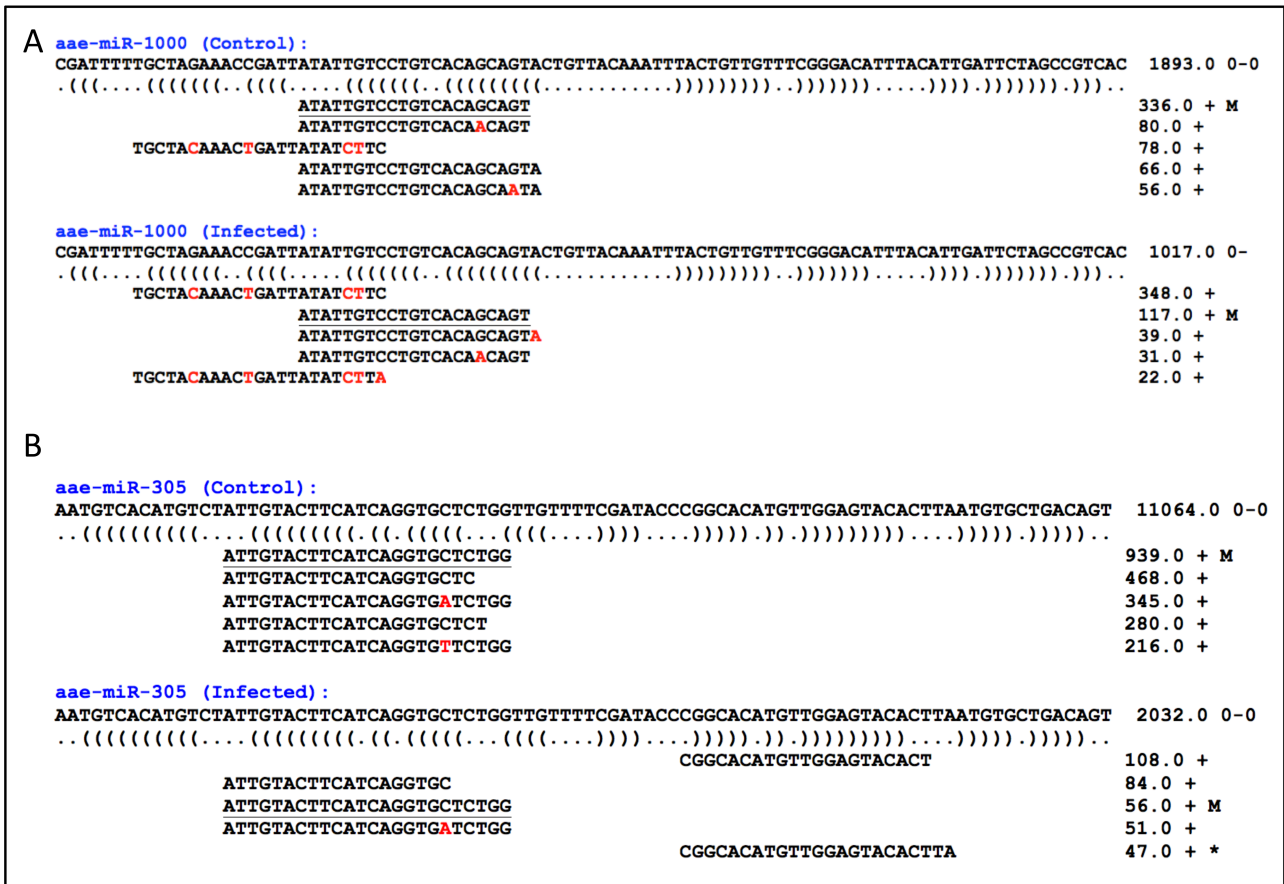

**Figure S3. Schematic representation of two examples of arm-switching event.** This figure displays schematically the area from which the most abundant isomiR read originates from within its precursor for both miRNAs (A) aae-mir-1000 and (B) aae-miR-305 in uninfected and DENV-infected treatments. Shifting of mature miRNA occurred in miR-1000 after infection and an arm-switching event happened in miR-305. The highly expressed miRNA was detected in 5p arm of the control group, which switched to 3p arm in infected mosquitoes (B).

| A | Control day 2                                  | B | Infected day 2                            |
|---|------------------------------------------------|---|-------------------------------------------|
|   | AUGACU CUUGUGCGUGUGACAACGG CUAUUG 23908.0 0-0  |   | ACU CUUGUGCGUGUGACAACGG CUAUUG 14493.0 0- |
|   | .)))..)))))...))..))...))...))....             |   | .)))))...))..))...))...))....             |
|   | CUUGUGCGUGUGACAACGG CUAU 5527.0 +              |   | CUUGUGCGUGUGACAACGG CUAU 3267.0 +         |
|   | CUUGUGCGUGUGACAACGG CUAU 1910.0 +              |   | CUUGUGCGUGUGACAACGG CUAU 907.0 +          |
|   | CUUGUGCGUGUGACAACGG CUAU 1481.0 +              |   | CUUGUGCGUGUGACAACGG CUAU 735.0 +          |
|   | UUGUGCGUGUGACAACGG CUAU 994.0 +                |   | CUUGUGCGUGUGACAACGG CU 468.0 +            |
|   | UUGUGCGUGUGACAACGG CUAU 476.0 +                |   | UUGUGCGUGUGACAACGG CUAU 416.0 +           |
|   | CUUGUGCGUGUGACAACGG CUAU 448.0 +               |   | CUUGUGCGUGUGACAACGG CUAU 254.0 +          |
|   | CUUGUGCGUGUGACAACGG CAAU 432.0 +               |   | CUUGUGCGUGUGACAACGG CUAC 226.0 +          |
|   | CUUGUGCGUGUGACAACGG CU 379.0 +                 |   | CUUGUGCGUGUGACAACGG CUAU 217.0 +          |
|   | CUUGUGCGUGUGACAACGG CUAC 275.0 +               |   | CUUGUGCGUGUGACAACGG CAAU 176.0 +          |
|   | CUUGUGCGUGUGACAACGG CUAU 266.0 +               |   | UUGUGCGUGUGACAACGG CUAU 168.0 +           |
|   | CUUGUGCGUGUGACAACGG CUAUA 250.0 +              |   | CUUGUGCGUGUGACAACGG CUAU 168.0 +          |
|   | UUGUGCGUGUGACAACGG CUAU 249.0 +                |   | CUUGUGCGUGUGACAACGG CU 139.0 +            |
|   | CUUGUGCGUGUGACAACGG CUAU 234.0 +               |   | CUUGUGCGUGUGACAACGG CUAUA 123.0 +         |
|   | CUUGUGCGUGUGACAACGG CU 221.0 +                 |   | UUGUGCGUGUGACAACGG CUAU 120.0 +           |
|   | CUUGUGCGUGUGACAACGG CUA 162.0 +                |   | CUUGUGCGUGUGACAACGG CU 105.0 +            |
|   | CUUGUGCGUGUGACAACGG CUAU 160.0 +               |   | CUUGUGCGUGUGACAACGG CC 92.0 +             |
|   | CUUGUGCGUGUGACAACGG AU 156.0 +                 |   | CUUGUGCGUGUGACAACGG CCAU 89.0 +           |
|   | CUUGUGCGUGUGACAACGG CUAUC 150.0 +              |   | CUUGUGCGUGUGACAACGG CUAU 85.0 +           |
|   | CUUGUGCGUGUGACAACGG CU 121.0 +                 |   | CUUGUGCGUGUGACAACGG AU 81.0 +             |
|   | CUUGUGCGUGUGACAACGG CUAUG 119.0 +              |   | CUUGUGCGUGUGACAACGG CUAUC 81.0 +          |
|   | CUUGUGCGUGUGACAACGG CUAUA 117.0 +              |   | CUUGUGCGUGUGACAACGG CUA 80.0 +            |
|   | CUUGUGCGUGUGACAACGG CUAU 115.0 +               |   | CUUGUGCGUGUGACAACGG CUA 78.0 +            |
|   | CUUGUGCGUGUGACAACGG CCAU 110.0 +               |   | CUUGUGCGUGUGACAACGG CUAUG 78.0 +          |
|   | CUUGUGCGUGUGACAACGG AU 110.0 +                 |   | CUUGUGCGUGUGACAACGG CCAU 77.0 +           |
|   | CUUGUGCGUGUGACAACGG CAAU 104.0 +               |   | CUUGUGCGUGUGACAACGG CUAU 72.0 +           |
|   | CUUGUGCGUGUGACAACGG CU 104.0 +                 |   | CUUGUGCGUGUGACAACGG C 70.0 +              |
|   | CUUGUGCGUGUGACAACGG CC 101.0 +                 |   | CUUGUGCGUGUGACAACGG CUAU 70.0 +           |
|   | CUUGUGCGUGUGACAACGG ACU 100.0 +                |   | CUUGUGCGUGUGACAACGG ACU 67.0 +            |
|   | CUUGUGCGUGUGACAACGG CAAU 94.0 +                |   | CUUGUGCGUGUGACAACGG AU 61.0 +             |
|   | CUUGUGCGUGUGACAACGG CUA 91.0 +                 |   | CUUGUGCGUGUGACAACGG CUAGU 60.0 +          |
|   | CUUGUGCGUGUGACAACGG CUAC 79.0 +                |   | CUUGUGCGUGUGACAACGG CUAUA 58.0 +          |
|   | CUUGUGCGUGUGACAACGG UAU 79.0 +                 |   | CUUGUGCGUGUGACAACGG CUACU 57.0 +          |
|   | CUUGUGCGUGUGACAACGG CUAU 79.0 +                |   | CUUGUGCGUGUGACAACGG UAU 55.0 +            |
|   | CUUGUGCGUGUGACAACGG CAUA 78.0 +                |   | CUUGUGCGUGUGACAACGG GCU 55.0 +            |
|   | CUUGUGCGUGUGACAACGG CUA 76.0 +                 |   | CUUGUGCGUGUGACAACGG ACUAC 54.0 +          |
|   | CUUGUGCGUGUGACAACGG UUAU 75.0 +                |   | CUUGUGCGUGUGACAACGG CUAUG 50.0 +          |
|   | CUUGUGCGUGUGACAACGG CUACU 75.0 +               |   | CUUGUGCGUGUGACAACGG CUA 49.0 +            |
|   | CUUGUGCGUGUGACAACGG UAGCG 75.0 +               |   | CUUGUGCGUGUGACAACGG CUAU 48.0 +           |
|   | CUUGUGCGUGUGACAACGG CU 74.0 +                  |   | CUUGUGCGUGUGACAACGG CAAU 47.0 +           |
|   | CUUGUGCGUGUGACAACGG CUAC 73.0 +                |   | CUUGUGCGUGUGACAACGG CUAUAU 46.0 +         |
|   | UUGUGCGUGUGACAACGG CAAU 71.0 +                 |   | CUUGUGCGUGUGACAACGG CAAU 46.0 +           |
|   | CUUGUGCGUGUGACAACGG CUAU 70.0 +                |   | CUUGUGCGUGUGACAACGG CUAC 45.0 +           |
|   | UUGUGCGUGUGACAACGG CUAU 70.0 +                 |   | CUUGUGCGUGUGACAACGG CCAU 45.0 +           |
|   | CUUGUGCGUGUGACAACGG CUAG 66.0 +                |   | CUUGUGCGUGUGACAACGG CUAG 45.0 +           |
|   | CUUGUGCGUGUGACAACGG CUAC 66.0 +                |   | CUUGUGCGUGUGACAACGG CUACU 45.0 +          |
|   | CUUGUGCGUGUGACAACGG GAUA 63.0 +                |   | CUUGUGCGUGUGACAACGG 45.0 + M              |
|   | CUUGUGCGUGUGACAACGG CCAU 62.0 +                |   |                                           |
|   | CUUGUGCGUGUGACAACGG CUAGU 62.0 +               |   |                                           |
|   | UUGUGCGUGUGACAACGG CUAC 58.0 +                 |   |                                           |
|   | CUUGUGCGUGUGACAACGG CUA 57.0 +                 |   |                                           |
|   | CUUGUGCGUGUGACAACGG CUA 57.0 +                 |   |                                           |
|   | CUUGUGCGUGUGACAACGG CUA 56.0 +                 |   |                                           |
|   | CUUGUGCGUGUGACAACGG CAAU 55.0 +                |   |                                           |
|   | CUUGUGCGUGUGACAACGG CUAUAU 54.0 +              |   |                                           |
|   | UUGUGCGUGUGACAACGG CUAUA 53.0 +                |   |                                           |
|   | CUUGUGCGUGUGACAACGG CCAU 52.0 +                |   |                                           |
|   | UUGUGCGUGUGACAACGG CUAU 52.0 +                 |   |                                           |
|   | CUUGUGCGUGUGACAACGG C 50.0 +                   |   |                                           |
|   | CUUGUGCGUGUGACAACGG CUA 50.0 +                 |   |                                           |
|   | CUUGUGCGUGUGACAACGG CUAUG 49.0 +               |   |                                           |
|   | CUUGUGCGUGUGACAACGG 49.0 + M Canonical miR-210 |   |                                           |

**Figure S4. Changes in the number of unique reads produced by miR-210 in infected and control groups.** Highlighted in yellow are all those sequences which matched the exact miR-210 as annotated in miRBase. (A) IsomiRs expressed more highly than the canonical miR-210 in the control group. (B) The DENV-infected group exhibited a reduced number of unique reads.

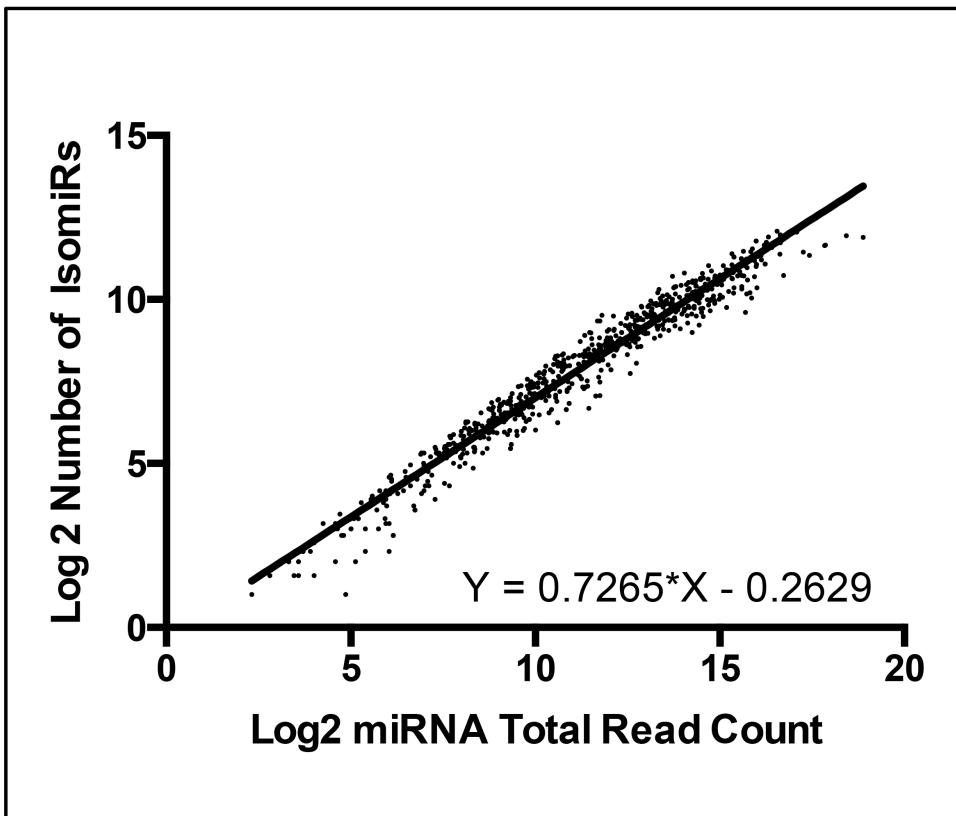

**Figure S5. The linear relationship between miRNA expression and isomiR production.** The graph depicts the relationship between the read count of miRNAs and the total number of unique reads or isomiRs produced by those miRNAs. For more highly expressed miRNAs, a greater number of unique reads were generated.
